# Supplementary material for: The kleisin subunit controls the function of C. elegans meiotic cohesins by determining the mode of DNA binding and differential regulation by SCC-2 and WAPL-1
Source: eLife. 2023 Aug 31;12:e84138. doi: 10.7554/eLife.84138 (PMC10497282; doi:10.7554/eLife.84138)
Supplement: Figure 1—source data 1. [file elife-84138-fig1-data1.xlsx]

## Sheet: Sheet1
B					D										E												F
	COH-3::GFP	COH-4::GFP	REC-8::GFP			smc-1::GFP		smc-1::GFP rec-8		smc-1::GFP coh-3 coh-4										rec-8::GFP
	4839.89	3404.55	1439.42																	Nucleus														coh-3::GFP coh-4::GFP
	5233.33	3493.02	1484			440.301		411.925		322.359							1	2	3	4	5	6	7	8	9									Nucleus
	4487.75	2723.8	1454.91			448.181		419.097		315.581					Time (secs)	0	0	0	0	0	0	0	0	0	0				1	2	3	4	5	6	7	8	9	10	11
	4386.17	2528.49	1614.12			451.605		401.071		329.944						60	0.0313183	-0.116122	0.0547893	-0.027986	0.250184	0.178548	0.336647	0.0905029	-0.0367699		Time (secs)	0	0	0	0	0	0	0	0	0	0	0	0
	5277.15	2592.36	1165.82			436.913		429.851		396.294						120	0.17068	-0.137154	0.140268	-0.0322051	0.123316	0.083715	0.179222	-0.0221982	0.204485			60	0.140504	0.18307	0.0092716	0.23044	0.1376	0.071479	0.00080896	-0.0176162	0.121241	0.0646627	0.253057
	4667.08	2602.66	1174.27			468.284		398.353		371.674						180	0.0512516	0.0429993	0.143904	0.112639	0.701219	0.0317147	0.261537	0.00955026	0.149917			120	0.314103	0.218554	0.0968514	0.0802977	0.162037	-0.0082519	0.0999766	-0.0324607	0.369504	0.0979198	0.366537
	4900.61	2714.11	1294.78			446.548		413.47		397.964						240	0.132339	0.0491022	0.141159	0.163235	0.697694	0.236227	0.211923	-0.141221	0.356383			180	0.57176	0.314529	0.121873	0.0779118	0.136939	0.00539775	0.218752	0.0540874	0.679694	0.204662	0.149581
	5937.4	2697.55	1271.47			453.316		429.21		393.266						300	0.191594	0.202198	0.0975865	0.166275	0.0885423	0.145176	0.287021	-0.221991	0.142897			240	0.984281	0.0877307	0.0414431	0.0601809	0.0659629	-0.0081506	0.130989	-0.0162381	0.2615	0.113931	0.365409
	4917.24	2821.9	1274.11			458.938		405.131		448.819						360	0.127394	0.175362	0.148116	0.0414502	0.0504645	0.244555	0.438665	0.0815942	0.215542			300	0.595151	0.561888	0.103273	0.0586041	0.135155	-0.0408001	0.157278	0.0436301	0.215883	0.19732	0.231074
	5202.69	2708.59	1238.89			473.802		413.316		339.68						420	0.231058	0.0906413	0.0828142	0.0220111	0.490147	0.104779	0.233152	-0.0584458	0.131663			360	0.774504	0.351672	0.142941	0.0583586	0.127543	0.0274209	0.230796	0.00730282	0.0888871	0.188335	0.343724
	4989.38	2692.77	1213.87			445.233		415.879		311.043						480	0.153816	0.0125108	0.171744	0.269746	0.0840763	0.229215	0.512252	0.126846	0.200573			420	0.772963	0.126257	0.173641	0.0107627	0.129534	0.103406	0.205547	0.0256002	0.0323451	0.0866089	0.279125
	4838.63	2607.57	1192.53			460.198		435.801		309.692						540	0.0332569	-0.0667357	-0.0410792	0.0730428	0.493102	0.127786	0.439826	0.109993	0.0610448			480	0.449531	0.222995	0.115676	-0.0374117	0.395688	-0.019418	0.476353	0.0150266	0.154902	0.115771	0.339686
	4971.24	2805.79	1279.23			486.808		408.419		303.148						600	0.11845	-0.0042556	0.106664	0.0968898	0.399484	0.103097	0.422607	-0.121251	0.630609			540	0.537289	0.434009	0.107419	0.0707569	0.185004	0.0880466	0.363448	0.0777555	0.145885	0.112458	0.248551
	4502.46	2611.41	1294.56			448.555		392.083		291.98						660	-0.0595909	0.0167775	0.0298715	-0.0236495	0.166577	0.139029	0.34037	0.11901	0.152654			600	0.538221	0.308578	0.287701	-0.0064755	0.25705	0.054718	0.294065	0.052011	0.241515	0.222682	0.403166
	4581.15	2963.8	1251.66			437.219		380.538		296.397						720	0.00213147	-0.0799733	0.159781	0.0123489	0.383648	0.171606	0.156534	0.0364988	0.0645967			660	0.394984	0.494443	0.132757	0.0866336	0.312628	-0.0002863	0.318386	0.0736605	0.182408	0.222606	0.19372
	4398.89	2995.67	1279.93			448.165		384.828		294.436						780	-0.0657184	0.106468	0.0486668	0.123739	0.274791	0.208579	0.282226	-0.0810508	0.0982625			720	1.23017	0.419751	0.121833	-0.0203333	0.260524	0.137033	0.247023	0.0933667	0.250445	0.272633	0.348378
	4665.32	2907.32	1285.77			461.561		424.8		304.595						840	0.0811596	0.0908465	0.147903	0.0796237	0.221787	0.251448	0.369982	-0.0279046	0.0244561			780	0.658172	0.570551	0.153653	0.0239085	0.389679	0.0608222	0.636798	0.239699	0.389066	0.171319	0.22139
	5676.76	2806.12	1276.77			481.344		405.61		302.957						900	0.0973577	0.019349	0.142418	0.0205077	0.302272	0.0941627	0.574605	0.069306	0.137743			840	0.783026	0.59159	0.189134	0.0232751	0.345828	0.132588	0.47734	0.118261	0.350884	0.214929	0.539676
	5261.61	2811.5	1341.07			429.725		370.048		343.192						960	0.155243	0.184867	0.121812	0.0900618	0.0507385	0.102315	0.332741	0.117191	0.102203			900	0.965243	0.515794	0.308368	0.131852	0.475301	-0.0278323	0.654531	0.124575	0.594533	0.227116	0.31176
	5950	2790.29	1324.2			434.674		390.816		323.388						1020	0.0396159	-0.141944	0.0857407	-0.0595325	-0.172946	-0.0150406	0.299142	0.0325663	0.326963			960	1.13885	0.481105	0.19152	-0.0070557	0.267106	0.110601	0.525838	0.168294	0.639264	0.166071	0.363954
	5956.2	2837.6	1319.27			455.291		403.714		341.447						1080	0.0822424	-0.0526782	0.0903681	-0.0200578	-0.155981	0.0304054	0.134689	0.0811659	0.21383			1020	0.603658	0.590471	0.174939	0.0801747	0.258926	0.485964	0.402772	0.0840407	0.702302	0.189542	0.519854
	5582.9	2623.8	1354.13			424.388		404.853		314.828						1140	0.167282	0.135718		-0.086691	-0.0535454	-0.259956	0.380008	0.0332058	0.341272			1080	0.982975	0.587698	0.157538	0.213798	0.282722	0.0242167	0.508732	0.182357	0.837767	0.171019	0.371593
	5635.75	2513.26	1356.25			445.48		542.29		304.12						1200	0.00712199	0.144355		0.00010466	0.506193	0.122864	0.125339	0.0869549	0.461172			1140	0.98122	0.599091	0.356946	0.117784	0.174344	0.460331	0.657878	0.0862094	0.453399	0.234496	0.28479
	4389.35	3130.99	1327.33			451.656		537.341		298.562																		1200	1.36191	0.524472	0.434241	0.240301	0.39442	0.293364	0.462951	0.2836	0.249203	0.261473	0.404329
	4691.39	3034.15	1337.12			444.209		546.448		324.622
	4730.42	2972.39	1379.29			438.551		541.455		305.329
	3964.78	3146.63	1348.18			449.258		534.012		323.606
	3906	2974	1349.2			428.811		556.712		292.512
	4691	2982	1366.38			422.558		557.779		268.909
	4150.67	2692.56	1305.82			440.399		588.633		277.682
	4469.47	2757.34	1309.68			455.232		591.713		257.61
	4472.55	2813.12	1288.66			464.682		564.972		260.873
	5163.78	2965.81	1313.39			458.881		617.62		253.38
	5281.41	3073.76	1266.61			466.324		605.087		237.16
	6212.02	2908.77	1343.17			464.459		559.464		251.737
	4873.92	2829.77	1354.67			468.255		568.678		243.977
	5670.76	2837.7	1408.22			467.387		634.236		233.587
	5285.91	2583	1418.58			473.428		672.836		279.716
	5088.67	2855	1459.14			469.846		530.953		228.207
	4278.66	3013	1480.12			468.631		520.274
	4248.74	2734	1543.55			472.159		529.086
	5538.45	2627.58	1486.49			475.612		514.843
	5777.61	2874.33	1463.09			486.103		545.827
	4147.49	2831.8	1566.29			388.813		510.833
	5373.28	2629.86	1422.22			365.896		494.045
	6261.78	2662.76	1462.28			386.238		566.027
	5409.67	3005.88	1475.41			361.509		419.441
	6253.42	3010.04	1318.31			378.813		480.594
	6006.7	2796.75	1411.55			410.762		537.584
	4955	2899.22	1347.57			463.818		470.136
	5321.12	2727.48	1374.02			456.511		422.253
	5530.92	2587.04	1316.54			516.617		354.519
	4431.3	2749.88	1330.54			537.105		363.657
	4975.38	2773.57	1321.09			400.532		393.103
	4130.22	2672.9	1304.35			512.877		404.276
	3967.88	2654.18	1317.4			498.973		428.527
	4534.12	2668.34	1368.72			548.16		414.089
	4405.5	2629	1322.58			557.105		356.98
	5382.46	2524.25	1378.38			329.885		339.472
	4566.89	2593.61	1329.26			355.146		418.18
	4940.26	2618.66	1377			326.264
	4859.12	2667.01	1469.99			351.625
	4880.93	2612.3	1409.07			380.763
	5664	2587.17	2123.5			591.668
	5345	2303	2158.8			445.175
	5726.91	2385.64	2159.5			431.29
	4620.75	2525.74	2159.79			438.999
	4441.93	1558.54	2309.15			458.394
	4366.73	1543.4	2395.45			486.76
	4072.24	1348.21	2321.49			492.114
	3905.21	1421.95	2337.23			447.93
	4880.25	1748	2415.46			416.252
	4545.59	1500.24	2504.81			487.776
	5106.88	1923.05	2610.59			521.306
	4949.35	1748.56	2229			556.681
	5502.88	1761.64	2300.44			611.095
	4195	1767.7	2450.75			632.771
	4844.26	1548.5	2400.28			632.755
	4718.29	1457.69	2476.7			582.772
	4301.55	1493.48	2453.99			642.241
	4194.13	1490.58	2449.54			572.851
	4704.19	1451.16	2419.46			403.266
	4661.49	1578.8	2440.06			457.82
	4437.95	1498.34	2643			669.144
	4943.67	1517.8	2442.5
	4001.33	1881.45	2516.59
	4038.46	1614.01	2511.25
	4105.04	1632.26	2440.23
	4494.02	1574	2267
	4424.47	1543.98	2277.18
	4453.61	1584.63	2397.88
	4852.83	1551.99	2371.31
	4087.91	1625.18	2635.91
	4618.91	1573.37	2598.54
	4408.66	1743.96	2516.1
	3895.59	1705.23	2629.5
	4656.29	1906.85	2540.6
	4633.82	1869.29	2629.34
	5759.61	1598.54	2574.89
	5353.4	1697.84	2606.54
	4562.59	1622.33	2595.5
	5672.35	1554.67	2454.17
	4702.38	1582	2305.16
	4048.2	1589.1	2311.68
	4352.57	1713.3	2265.14
	5097.86	1723.58	2256.03
	4055.2	1695.2	2079.83
	3985.14	1732.03	2057.59
	4391.33	1580	2355.06
	4442.01	1749.1	2259.15
	4562.23	1900.03	2305.41
	4170.97	1806.21	2372.53
	4429.53	1759.17	2570.05
	3944.87	1860.78	2429.52
	3909.21	1781	2442.72
	3893.2	1932.3	2595.84
	4177.33	1786.5	2078.82
	5066.75	1827.81	2094.82
	5224.69	1908.6	1923.55
	5697.68	1727.8	1928.55
	4806.86	1824.33	2234.09
	5489.86	1947.39	2120.79
	5429.12	1630.75	1862.22
	5250.67	1617.98	1890.8
	4925.91	1620.13	1819.85
	4977.34	1679.66	1828.22
	5082.38	1889.34	2305.36
	5172	1848.62	2344.33
	5307	2084.65	2459.25
	4559.22	2132.65	2359.11
	4434.46	1899.45	2386.85
	5177.52	1866.35	2349.12
	4319.82	1793.75	2223.98
	4767.39	1841.6	2331.3
	4990.4	2008	2245.01
	5514.44	1370.96	2352.47
	5312.8	1392.22	2337.08
	4998.15	1446.5	2335.75
	5044.97	1485.2	2169.71
	4757.29	1337.75	2250.61
	4906.93	1252.44	2344.88
	4520.06	1345.35	2390.04
	4811.35	1305.34	2459.82
	4949.73	1328.78	2341.06
	5857.09	1257.33	2333.64
	4938	1273.4	2216.46
	5090.33	1392.07	2198.25
	5144.21	1398.93	2233.26
	4851.79	1373.29	2009.87
	5570.94	1362.37	2057.41
	5454.42	1406.16	2099.8
	5988.37	1335.2	2111.62
	5199.15	1410.14	2020.04
	5244.3	1421.7	2068.01
	5735.62	1359.85	2204.34
	6015.89	1456	2128.95
	5027.59	1452.78	2241.78
	5256.72	1568.4	2292.82
	5564.48	1672.4	2160.1
	4569.55	1689.5	2140.07
	4886.09	1627.63	2181.7
	4905.42	1540.07	2182.28
	4463.82	1806	2069.19
	4561.31	1662.67	2116.73
	4887.82	1533.56	1970.99
	4625.84	1746.7	1968.39
	4762.17	1845.44	2044
	4824.89	1893.31	2004.95
	4584.83	1536.12	2016.73
	3919.89	1688.56	2075.35
	4626.99	1614.4	2024.49
	4151.55	1608.6	2059.84
	4753.66	1707.81	2133.78
	5273.53	1621.43	1985.32
	4547.75	1583.12	2026.11
	5708.33	1635.01	2104.44
	5191.61	1577.6	1958.29
	4670.56	1577.81	1969.44
	4916	1637.26	1913.5
	4749.14	1820.47	1905.38
	5414.59	1678.36	1883.5
	4699.17	1683.21	1899.7
	4839.08	1567.95	1984.38
	4647.82	1564.48	1865.68
	4707.91	1508.53	1798.95
	4515.56	1460.78	1826.04
	4300.96	1459.33	1804.58
	4537.35	1402	1872.28
	4870.99	1533.76	1860.55
	4373.77	1485.41	1919.22
	4520.3	1709.57	2000.84
	4900.59	1817.2
		1519.73
		1445.17
		1486.57
		1448.19
		1509.12
		1544.26
		1668.66
		1522.52
