# Supplementary material for: The kleisin subunit controls the function of C. elegans meiotic cohesins by determining the mode of DNA binding and differential regulation by SCC-2 and WAPL-1
Source: eLife. 2023 Aug 31;12:e84138. doi: 10.7554/eLife.84138 (PMC10497282; doi:10.7554/eLife.84138)
Supplement: Figure 2—source data 1. [file elife-84138-fig2-data1.xlsx]

## Sheet: Sheet1
A						rec-8::GFP													rec-8::GFP wapl-1									B	anti-COH-3/4					anti-HA			C	anti-COH-3/4		scc-2::AID::GFP
						Nucleus													Nucleus										scc-2::AID::GFP					scc-2::AID::GFP rec-8::HA				No auxin	No auxin	Auxin	Auxin
		1	2	3	4	5	6	7	8	9						1	2	3	4	5	6	7	8	9					Untrated	Auxin 8 hrs	Auxin 14 hrs			Untrated	Auxin			Empty RNAi	wapl-1 RNAi	Empty RNAi	wapl-1 RNAi
Time (secs)	0	0	0	0	0	0	0	0	0	0				Time (secs)	0	0	0	0	0	0	0	0	0	0					567.823	323.546	212.05			1284.82	1066.7			692.898	1022.5	332.153	566.345
	60	0.0313183	-0.116122	0.0547893	-0.027986	0.250184	0.178548	0.336647	0.0905029	-0.0367699					60	0.269411	0.237601	0.0844316	0.0630944	-0.555165	-0.0077294	-0.0175381	0.360033	-0.161125					577.294	328.194	222.544			1385.79	1126.86			728.157	1023.85	311.166	603.083
	120	0.17068	-0.137154	0.140268	-0.0322051	0.123316	0.083715	0.179222	-0.0221982	0.204485					120	0.137312	0.254829	0.043757	-0.0493968	-0.0736493	0.144113	-0.150719	0.226356	0.118403					585.245	320.93	226.21			1439.4	1182.85			720.506	1015.3	327.245	593.775
	180	0.0512516	0.0429993	0.143904	0.112639	0.701219	0.0317147	0.261537	0.00955026	0.149917					180	0.130622	0.264643	0.192691	0.0710851	0.171288	0.0917814	-0.0485261	-0.128734	0.111623					635.629	329.347	224.78			1446.08	1235.89				1036.4	314.07	563.53
	240	0.132339	0.0491022	0.141159	0.163235	0.697694	0.236227	0.211923	-0.141221	0.356383					240	0.290131	0.256247	0.0355195	-0.12938	-0.221173	0.0839774	-0.114729	-0.0059727	0.118073					574.867	324.31	233.347			1459.16	1200.38			700.701	971.024	309.963	548.21
	300	0.191594	0.202198	0.0975865	0.166275	0.0885423	0.145176	0.287021	-0.221991	0.142897					300	0.588903	0.243143	0.277255	0.182084	-0.198459	0.35861	-0.160014	0.0331393	-0.0347167					603.052	325.361	247.38			1470.29	1219.14			636.962	1006.2	309.05	578.372
	360	0.127394	0.175362	0.148116	0.0414502	0.0504645	0.244555	0.438665	0.0815942	0.215542					360	0.0471009	0.313585	0.105844	0.0362756	-0.0040258	0.195043	0.00621064	0.141744	-0.0220426					575.141	331.376	246.882			1443.29	1281.93			707.085	986.486	299.389	605.192
	420	0.231058	0.0906413	0.0828142	0.0220111	0.490147	0.104779	0.233152	-0.0584458	0.131663					420	0.160653	0.372377	0.0634702	0.0377512	-0.0006766	0.107154	-0.009885	0.635301	-0.0678457					584.971	327.777	203.996			1419	1289.14			768.129	973.393	303.367	624.173
	480	0.153816	0.0125108	0.171744	0.269746	0.0840763	0.229215	0.512252	0.126846	0.200573					480	0.122584	0.0383882	0.0780809	0.0364735	-0.105976	0.424574	-0.0576377	-0.0683123	-0.0666327					591.297	322.646	194.514			1401.28	1260.02			690.161	1034.88	317.81	585.537
	540	0.0332569	-0.0667357	-0.0410792	0.0730428	0.493102	0.127786	0.439826	0.109993	0.0610448					540	0.0778502	0.277834	0.132989	0.0983666	-0.235776	0.0634027	-0.108896	0.287771	-0.0943892					588.623	324.572	187.335			1332.37	1272.81			662.713	993.263	346.384	568.649
	600	0.11845	-0.0042556	0.106664	0.0968898	0.399484	0.103097	0.422607	-0.121251	0.630609					600	0.217519	0.398092	0.0301885	0.0667292	-0.243839	-0.237676	-0.165951	0.166969	-0.0684559					554.319	330.518	189.781			1209.57	1296.4			637.91	975.969	358.485	578.536
	660	-0.0595909	0.0167775	0.0298715	-0.0236495	0.166577	0.139029	0.34037	0.11901	0.152654					660	0.140202	0.11377	0.0210505	-0.0003326	-0.226782	-0.0321392	-0.180559	0.173541	0.0462055					597.837	332.552				1273.65	1272.74			671.235	946.888	293.652	564.216
	720	0.00213147	-0.0799733	0.159781	0.0123489	0.383648	0.171606	0.156534	0.0364988	0.0645967					720	0.0331321	0.182649	0.0824896	0.205368	-0.0870168	0.00133484	0.0195507	0.159725	-0.0109022					589.171	330.709	179.296			1334.8	1297.14			689.022	991.554	289.706	564.479
	780	-0.0657184	0.106468	0.0486668	0.123739	0.274791	0.208579	0.282226	-0.0810508	0.0982625					780	0.196527	0.215529	0.125506	-0.0869363	-0.169269	0.104103	-0.033642	0.294715	0.0624158					602.619	323.898	182.846			1456	1300.59			714.443	973.844	290.504	572.276
	840	0.0811596	0.0908465	0.147903	0.0796237	0.221787	0.251448	0.369982	-0.0279046	0.0244561					840	-0.073958	0.0833971	0.0556451	-0.228906	0.514551	-0.0353108	-0.0143977	0.247916	-0.0557601					597.801	318.481	179.431			1019.86	1286.8			717.054	951.9	297.932	599.134
	900	0.0973577	0.019349	0.142418	0.0205077	0.302272	0.0941627	0.574605	0.069306	0.137743					900	0.0409673	0.273372	-0.0111738	0.14779	-0.247942	-0.0079027	0.0332623	0.330053	-0.0775511					571.666	322.301	183.96			1053.97	1109.2			652.907	981.609	312.708	651.269
	960	0.155243	0.184867	0.121812	0.0900618	0.0507385	0.102315	0.332741	0.117191	0.102203					960	0.116022	0.299608	0.109513	0.129298	-0.23088	0.156485	0.113166	0.377572	-0.0462404					567.524	322.547	183.856			1049.86	1144.72			647.449	951.166	299.609	647.082
	1020	0.0396159	-0.141944	0.0857407	-0.0595325	-0.172946	-0.0150406	0.299142	0.0325663	0.326963					1020	0.146154	0.297746	0.0614821	0.352177	-0.240659	0.146616	0.129762	0.345499	-0.0042149					571.51	321.3	183.521			1080.76	1168.99			606.537	941.684	287.18	611.432
	1080	0.0822424	-0.0526782	0.0903681	-0.0200578	-0.155981	0.0304054	0.134689	0.0811659	0.21383					1080	0.0794391	0.358151	0.10175	-0.0407597	-0.162291	0.203045	0.0910369	0.302381	0.0173195					581.227	318.216	187.851			1076.36	1125.74			559.437	924.698	286.991	568.952
	1140	0.167282	0.135718		-0.086691	-0.0535454	-0.259956	0.380008	0.0332058	0.341272					1140	0.343266	0.293917	-0.0456546	-0.0015637	-0.130649	0.154046	0.139535	0.331673	0.0299404						316.75	187.598			1338.68	1075.83			753.186	962.569	282.017	551.435
	1200	0.00712199	0.144355		0.00010466	0.506193	0.122864	0.125339	0.0869549	0.461172					1200	0.28981	0.238931	0.0341128	-0.0498556	-0.119591	0.147053	0.196105	0.262881	-0.203264					296.244	343.319	193.917			1250.83	1176.48			668.937	949.254	274.172	542.344
																													297.521	336.683	188.807			1280.89	1187.11			596.535	1000.59	278.372	552.798
																													315.086	345.706	188.726			1375.85	1189.31			601.838	1027	284.1	575.234
								coh-3::GFP coh-4::GFP													coh-3::GFP coh-4::GFP wapl-1								306.907	348.07	200.725			1402.04	1196.58			817.637	987.254	287.537	627.72
								Nucleus													Nucleus								314.38	339.964	202.904			1411.93	1196.03					302.039	618.438
			1	2	3	4	5	6	7	8	9	10	11				1	2	3	4	5	6	7	8	9	10			290.88	343.834	200.69			1434.37	1185.4			802.519	1381.66	317.751	568.864
	Time (secs)	0	0	0	0	0	0	0	0	0	0	0	0		Time (secs)	0	0	0	0	0	0	0	0	0	0	0			291.869		204.609			1411.45	1159.89			795.027	1235.2	344.088	558.018
		60	0.140504	0.18307	0.0092716	0.23044	0.1376	0.071479	0.00080896	-0.0176162	0.121241	0.0646627	0.253057			60	0.111761	0.00102161	0.0204474	0.114519	0.0883185	-0.0494526	0.0194374	-0.0420189	0.0727939	-0.0241319			275.145	271.147				1403.12	1195.8			790.484	1365.32		638.481
		120	0.314103	0.218554	0.0968514	0.0802977	0.162037	-0.0082519	0.0999766	-0.0324607	0.369504	0.0979198	0.366537			120	0.0370907	-0.0067165	0.0453203	0.138873	0.0825563	-0.0640167	0.149129	0.00998745	0.067469	0.0343982			291.218	270.135	231.581			1394.88	1123.28			733.116	1480.36	431.209	544.913
		180	0.57176	0.314529	0.121873	0.0779118	0.136939	0.00539775	0.218752	0.0540874	0.679694	0.204662	0.149581			180	0.086986	0.0386168	0.0661352	0.0787771	0.169061	-0.0536155	0.122738	0.0297282	0.116284	0.0278066			268.135	275.106	230.148			1425.72	1102.48			752.472	1382.37	433.244
		240	0.984281	0.0877307	0.0414431	0.0601809	0.0659629	-0.0081506	0.130989	-0.0162381	0.2615	0.113931	0.365409			240	0.018557	0.0507616	0.0359664	0.0850944	0.0391445	0.047914	0.129592	0.047955	0.125188	0.00747732			314.961	276.651	230.518			1238.11	1167.66			790.487	1222.32	432.031	688.765
		300	0.595151	0.561888	0.103273	0.0586041	0.135155	-0.0408001	0.157278	0.0436301	0.215883	0.19732	0.231074			300	-0.032696	0.168921	0.0645837	0.158541	0.0903981	0.0237676	0.190162	-0.0126972	0.215301	0.0576035			332.334	278.903	231.405			1387.92	1171.96			813.215	1195.91	445.535	677.031
		360	0.774504	0.351672	0.142941	0.0583586	0.127543	0.0274209	0.230796	0.00730282	0.0888871	0.188335	0.343724			360	0.0414093	0.11423	0.0973115	0.107436	0.131332	0.0138982	0.24277	0.0949742	0.239093	0.0858266			326.091	273.725	230.378			1411.54	1204.47			756.219	1223.06	441.322	639.324
		420	0.772963	0.126257	0.173641	0.0107627	0.129534	0.103406	0.205547	0.0256002	0.0323451	0.0866089	0.279125			420	0.00391469	0.015312	0.137113	0.14792	0.0633209	0.0435582	0.187158	0.223593	0.21907	0.0277768			343.933	276.187	230.818			1428.86	1147.94			759.085	1168.16	432.174	641.201
		480	0.449531	0.222995	0.115676	-0.0374117	0.395688	-0.019418	0.476353	0.0150266	0.154902	0.115771	0.339686			480	0.0778398	0.0778576	0.218429	0.132533	0.0389577	-0.0407563	0.13939	0.0871848	0.292717	0.151003			363.967	283.767	230.908			1393.59	1178.55			747.265	1409.62	431.338	653.875
		540	0.537289	0.434009	0.107419	0.0707569	0.185004	0.0880466	0.363448	0.0777555	0.145885	0.112458	0.248551			540	0.002194	-0.0026042	0.196336	0.176657	0.160592	-0.0110396	0.1601	0.0765371	0.0456653	0.0515145			372.383	287.164	231.916			1416.71	1162.54			782.207	1460.2	425.982	670.318
		600	0.538221	0.308578	0.287701	-0.0064755	0.25705	0.054718	0.294065	0.052011	0.241515	0.222682	0.403166			600	0.044569	0.00304164	0.262173	0.128988	0.172933	0.122993	0.0765597	0.0884662	0.145368	0.00775796			371.845	284.449	227.55			1344.14	1138.46			756.518	1391.8	424.068	656.056
		660	0.394984	0.494443	0.132757	0.0866336	0.312628	-0.0002863	0.318386	0.0736605	0.182408	0.222606	0.19372			660	0.0882596	0.0618876	0.197742	0.193103	0.213382	0.126273	0.127536	0.135733	0.329867	0.0833579			350.007	282.16	224.733			1402.93	1154.93			725.584	1312.86	418.985	662.023
		720	1.23017	0.419751	0.121833	-0.0203333	0.260524	0.137033	0.247023	0.0933667	0.250445	0.272633	0.348378			720	0.0425251	0.0538509	0.21311	0.115675	0.231589	0.0571376	0.258482	0.200506	0.385663	0.165774				284.521	227.069			1412.97	1165.35			717.723	1303.47	423.575	662.778
		780	0.658172	0.570551	0.153653	0.0239085	0.389679	0.0608222	0.636798	0.239699	0.389066	0.171319	0.22139			780	0.0675411	-0.0177181	0.126769	0.168757	0.235156	0.171024	0.167659	0.327884	0.401863	0.0300353			354.691	285.025	229.067			1429.99	1183.14			688.516	1159.89	430.646	682.227
		840	0.783026	0.59159	0.189134	0.0232751	0.345828	0.132588	0.47734	0.118261	0.350884	0.214929	0.539676			840	0.100324	0.016973	0.130929	0.168734	0.209484	0.0167304	0.188575	0.222261	0.30314	0.128792			353.873	281.53	227.415			1447.66	1190.84			726.124	1196.59	437.527	651.924
		900	0.965243	0.515794	0.308368	0.131852	0.475301	-0.0278323	0.654531	0.124575	0.594533	0.227116	0.31176			900	0.0107843	0.0407599	0.103522	0.261913	0.234002	0.110421	0.330805	0.257082	0.326896	0.281496			350.862	287.671	224.462			1420.38	1096.04			697.015	1203.9	449.81	684.249
		960	1.13885	0.481105	0.19152	-0.0070557	0.267106	0.110601	0.525838	0.168294	0.639264	0.166071	0.363954			960	0.0751271	-0.0588928	0.0584731	0.19892	0.333757	0.020982	0.369816	0.328398	0.416334	0.0820011			360.236	304.182	225.997			1423.85	1107.96			676.93	1328.02	455.127	663.296
		1020	0.603658	0.590471	0.174939	0.0801747	0.258926	0.485964	0.402772	0.0840407	0.702302	0.189542	0.519854			1020	0.0241292	0.0899107	0.0850262	0.133742	0.112503	0.200565	0.328028	0.0734849	0.0503369	0.112394			369.063	290.281	222.976			1399.29	1160.06			677.059	1319.71	438.791	648.76
		1080	0.982975	0.587698	0.157538	0.213798	0.282722	0.0242167	0.508732	0.182357	0.837767	0.171019	0.371593			1080	0.006442	0.0413501	0.115338	0.00983731	0.182184	0.0489764	0.1304	0.158514	0.153916	-0.0203174			379.125	306.796	222.902			1390.17	1035.36			739.85	1224.75	424.729	631.973
		1140	0.98122	0.599091	0.356946	0.117784	0.174344	0.460331	0.657878	0.0862094	0.453399	0.234496	0.28479			1140	0.0164488	0.0279088	0.0985449	0.164515	0.289787	0.0967981	0.264599	0.132849	0.0337122	0.12746			359.829	295.498	219.409			1234.14	1123.42			689.54	1214.98	425.088	631.69
		1200	1.36191	0.524472	0.434241	0.240301	0.39442	0.293364	0.462951	0.2836	0.249203	0.261473	0.404329			1200	0.0318764	0.0414071	0.149271	0.0885173	0.135611	0.257341	0.045507	0.159619	0.0290187	-0.0509984			374.644	300.903	221.607			1246.19	1256.97			661.609	1218.25	422.633	667.557
																													343.808	294.263				1289.72	1251.2			641.329	1120.45	415.707	630.967
																													342.201	300.796	238.821			1318.81	1301.08			662.067	1293.11	441.939	624.429
																													354.049	307.872	253.5			1304.57	1310.57			610.16	1085.89	422.56	643.417
																													371.712	300.215	252.488			1293.5	1245.58			579.086	965.547	416.948	631.783
																													379.343	307.06	259.907			1274.94	1299.59			580.665	1036.5	439.772	616.466
																													366.053	306.502	248.833			1346.15	1363.2				1233.79	449.757	608.621
																													364.453	306.047	259.83			1341.3	1375.41			650.652	1302.08	432.69	578.054
																													363.408	307.483	256.714			1263.38	1461.6			639.345		415.767	586.535
																													373.228		265.358			1167.89	1395.23			658.428	1187.14	419.301	604.304
																													366.015	311.528	261.63			1212.68	1185.27			650.201	1182.22	418.963	614.492
																													352.96	312.93	269.248			1269.45	1156.18			631.355	1173.2		636.739
																													350.781	315.811	269.072			1312.81	1294.37			644.788	1130.36	465.448	635.016
																													370.19	307.143	265.615			1334.04	1234.37			636.816	1130.74	460.448
																													372.115	297.285	267.659			1245.3	1225.59			656.475	1174.92	454.084	456.743
																													337.591	301.575	270.005			1171.11	1221.46			646.862	1238.16	469.361	496.606
																													331.166	305.566	272.258			1152.78	1109.25			654.246	1185.96	435.677	463.23
																													345.677	303.599	268.21			1029.18	1126.71			662.098	1144.6	446.44	455.977
																													331.213	316.566	269.034			966.082	1092.05			681.139	1130.69		452.035
																													336.081	323.135	270.275			1134.5	1128.06			650.086	1189.54	445.965	467.618
																													362.203	333.974	267.311			968.193	1205.53			662.74	1250.79	422.816	461.363
																														338.005	258.935			1066.69	1209.27			646.486	1211.47	430.565	533.427
																													471.72	320.674	270.65			1217.61	1201.9			657.936	1256.03	418.445	484.662
																													457.35	310.895	253.199			1251.56	1146.36			629.192	1259.38	443.941	482.787
																													478.13	320.522	254.68			1283.95	1121.47			665.66	1186.49	463.074	452.506
																													461.649	346.57	257.669			1257.99	1136.83			640.805	1145.38	449.158	446.226
																													460.743	360.7				1337.51	1143.76			629.792	1153.31	435.788	452.916
																													449.674	353.171	279.558			1298.81	968.534			631.699	1093.93	426.787	438.802
																													467.756	360.511	291.537			1316.56	964.281			596.088	1207.27	412.747	429.066
																													483.479	372.774	292.671			1308.52	919.457			633.153	1298	398.289	441.843
																													490.046	332.637	296.19			1203.07	933.31			631.909	1270.89	400.521	481.054
																													425.615	325.992	296.334			1205.23	1012.26			594.236	1260.08	416.796	446.358
																													449.072	381.768	290.874			1098.93	1065.48			623.644	1219.5	430.151	450.372
																													466.712	369.157	274.579			1068.25	950.478			654.162	1126.49	442.618	432.34
																													493.643	377.5	288.675			987.693	1020.05			581.452	1164.68	431.555	427.566
																													483.59	369.232	298.529			929.329	1012.75				1200.44	416.864	431.675
																													475.431	355.361	299.339			889.903	987.15					402.731
																													449.128	351.366	288.075			1109.74	1045.88					395.383	676.879
																													480.725	370.263	298.92			1315.21	1010.87						748.047
																													453.56	375.385	292.162			1348.31	948.791					381.492	721.735
																													443.314	370.184	283.767			1323.1	937.834					376.992	695.246
																													439.673	371.279	276.563			1340.46	937.506					378.639	698.663
																													444.762					1386.37	905.32					379.642	696.482
																														284.49	213.589			1344.88						382.068	718.201
																													536.78	291.599	216.744			1022.99						383.791	726.467
																													533.448	299.171	220.655			1092.25						384.113	708.51
																													542.928	300.46	223.058			1103.12						387.568	719.121
																													535.905	302.431	230.14			1095.12						379.482	717.909
																													533.656	297.135	225.997			1139.56						373.479	678.371
																													490.245	295.681	223.749			1156.81						369.343	651.011
																													538.766	310.237	221.708			1158.1						367.752	629.655
																													531.237	301.26	208.2			1152.98						360.963	613.821
																													540.238	292.454	217.812			1118.08						359.369	581.624
																													540.474	294.078	219.48			1070.95						361.646	601.023
																													499.784	307.146	222.201			1062.61						382.836	584.983
																													516.157	311.745				1132.73						397.404
																													531.801	323.253				1156.98						369.431	535.54
																													510.461	332.605				1112.53						353.373	518.321
																													507.69	324.902				1042.38						344.642	520.12
																													494.154	330.443										354.077	521.909
																														333.792										359.518	549.009
																													432.291	327.947										347.056	555.748
																													434.297	331.826										344.906	549.014
																													432.253	324.341										351.952	567.715
																													409.765	322.622										363.038	555.004
																													403.235	326										369.5	589.919
																													448.764												604.618
																													462.76	205.141										343.031	581.759
																													444.877	203.923										341.924	589.757
																													467.421	195.941										340.076	579.038
																													482.147	198.15										340.459	615.161
																													493.916	193.53										339.369
																													481.539	199.459										344.034
																													485.683	213.715										344.544
																													483.966	218.316										354.053
																													505.468	208.6										340.914
																													507.993	215.314										352.871
																													523.613	224.827										347.749
																													548.384	219.912										344.188
																														228.465										339.761
																													345.929	235.992										344.245
																													355.195	243.427										351.169
																													345.4	238.272										353.995
																													356.056	240.051										362.317
																													362.165	231.674										351.146
																													352.513	220.314										337.142
																													351.988	240.583										339.791
																													354.014	225.572										342.312
																													356.383	252.423										346.73
																													373.288	248.698										344.072
																													380.581	252.484										360.285
																													386.389	237.456										352.695
																													359.39	258.063										358.846
																														243.221										363.157
																																								354.575
																														244.246
																														256.963										372.216
																														249.691										338.757
																														265.565										375.177
																														255.77										378.724
																														277.197										384.341
																														273.47										363.922
																														259.575										361.727
																														265.821										355.179
																														260.145										350.135
																														263.581										355.425
																														279.555										346.817
																														275.89										340.297
																														278.819										357.126
																														263.711										352.837
																														256.965										364.948
																														246.895										340.95
																														238.182										328.52
																														249.712										329.641
																														262.132										315.446
																														255.527										316.231
																														234.779										326.238
																														233.905										312.95
																														234.617										307.568
																														225.192										311.062
																														257.188										336.772
																														259.48										328.873
																														264.533										308.051
																														257.698										293.674
																																								302.076
																														228.017										300.118
																														227.827										294.166
																														226.313										281.334
																														223.232										284.034
																														223.959										296.086
																														217.328										307.896
																														224.217										293.729
																														220.968										303.68
																														225.011
																														220.617
																														216.214
																														210.123
																														213.314
																														219.809
																														216.198
																														209.439
																														212.543
																														214.307
																														214.315
