# Supplementary material for: The kleisin subunit controls the function of C. elegans meiotic cohesins by determining the mode of DNA binding and differential regulation by SCC-2 and WAPL-1
Source: eLife. 2023 Aug 31;12:e84138. doi: 10.7554/eLife.84138 (PMC10497282; doi:10.7554/eLife.84138)
Supplement: Figure 3—figure supplement 1—source data 1. [file elife-84138-fig3-figsupp1-data1.xlsx]

## Sheet: Sheet1
A						D						E						F
			Number of diakinesis oocytes						Number of diakinesis oocytes						Number of diakinesis oocytes						Number of diakinesis oocytes
			-Auxin	+Auxin					-TEV	+TEV					-Auxin	+Auxin					-TEV	+TEV
	Chromosomes	6	20	0			Chromosomes	6	15	19			Chromosomes	6	27	0			Chromosomes	6	8	11
		7	0	0				7	0	0				7	1	0				7	0	1
		6L	0	19				6L	0	0				6L	0	19				6L	0	0
		DS	0	10				DS	0	0				DS	0	6				DS	0	0
