# Supplementary material for: The kleisin subunit controls the function of C. elegans meiotic cohesins by determining the mode of DNA binding and differential regulation by SCC-2 and WAPL-1
Source: eLife. 2023 Aug 31;12:e84138. doi: 10.7554/eLife.84138 (PMC10497282; doi:10.7554/eLife.84138)
Supplement: Figure 3—source data 1. [file elife-84138-fig3-data1.xlsx]

## Sheet: Sheet1
A						B					C					D						E					F						G
		Number of diakinesis oocytes						Number of diakinesis oocytes					Number of diakinesis oocytes					Number of diakinesis oocytes						Number of metaphase I oocytes					Number of metaphase I oocytes						rec-8 3XTEV::GFP rec-8
		-TEV	+TEV					-TEV	+TEV				-TEV	+TEV				-TEV	+TEV					-TEV	+TEV				-TEV	+TEV
Chromosomes	6	50	0			Chromosomes	6	33	26		Chromosomes	6	0	0		Chromosomes	6	0	0			Chromosomes	6	20	0		Chromosomes	6	17	15						Number of nuclei
	7	1	0				7	0	0			10 to 12	11	0			10 to 12	12	16				13 to 16	0	2			13 to 16	0	0				HIM-8 foci	1	2	3	4
	6L	0	31				6L	0	0			13 to 16	0	3			13 to 16	0	0				17 to 20	0	5			17 to 20	0	0			-TEV	Germline 1	45	4	0	0
	DS	0	22				DS	0	0			17 to 20	0	6			17 to 20	0	0				21 to 24	0	3			21 to 24	0	0				Germline 2	38	5	0	0
												21 to 24	0	2			21 to 24	0	0
																																	+TEV	Germline 1	1	5	7	7
																																		Germline 2	3	10	13	11
																																		Germline 3	5	10	8	12
																																			coh-3 3XTEV::mCh coh-3 coh-4
																																				Number of nuclei
																																		HIM-8 foci	1	2	3	4
																																	-TEV	Germline 1	43	6	0	0
																																		Germline 2	35	3	0	0
																																		Germline 3	45	3	0	0
																																	+TEV	Germline 1	33	4	1	0
																																		Germline 2	36	10	2	0
																																		Germline 3	34	7	1	0
																																			scc-1 3XTEV::GFP scc-1
																																				Number of nuclei
																																		HIM-8 foci	1	2	3	4
																																	-TEV	Germline 1	62	12	0	0
																																		Germline 2	68	1	0	0
																																		Germline 3	53	0	0	0
																																	+TEV	Germline 1	42	5	0	0
																																		Germline 2	36	4	0	0
