# Supplementary material for: The kleisin subunit controls the function of C. elegans meiotic cohesins by determining the mode of DNA binding and differential regulation by SCC-2 and WAPL-1
Source: eLife. 2023 Aug 31;12:e84138. doi: 10.7554/eLife.84138 (PMC10497282; doi:10.7554/eLife.84138)
Supplement: Figure 4—source data 1. [file elife-84138-fig4-data1.xlsx]

## Sheet: Sheet1
A								B					spo-11										spo-11 coh-3 coh-4											spo-11 rec-8
		Size (pixels of DAPI-stained bodies)
	WT	WT 100Gy	coh-3 coh-4	coh-3 coh-4 100Gy	rec-8	rec-8 100Gy			RAD-51 foci	Germline 1	Germline 2	Germline 3	Germline 4	Germline 5	Germline 6	Germline 7		RAD-51 foci	Germline 1	Germline 2	Germline 3	Germline 4	Germline 5	Germline 6	Germline 7	Germline 8	Germline 9		RAD-51 foci	Germline 1	Germline 2	Germline 3	Germline 4	Germline 5	Germline 6	Germline 7	Germline 8
	236	382	205	227	70	65			0	17	27	9	9	17	15	30		0	13	13	18	2	9	31	13	22	31		0	0	0	0	0	0	0	0	0
	198	161	508	88	476	9			1	4	6	15	4	10	8	0		1	8	8	6	6	3	0	7	6	5		1	0	0	0	0	0	0	0	0
	622	605	171	168	219	1111			2 3	4	0	2	2	8	3	0		2 3	11	1	2	10	5	0	15	6	0		2 3	4	1	3	0	0	0	0	4
	425	391	162	186	115	181			4 6	0	0	0	5	4	3	0		4 6	0	0	0	5	6	0	8	0	0		4 6	10	0	4	1	4	1	6	8
	600	192	167	101	807	22			7 12	0	0	0	6	0	0	0		7 12	0	0	0	3	3	0	0	0	0		7 12	17	10	11	6	13	10	10	16
	449	352	259	1025	484	62			>12	0	0	0	5	0	0	0		>12	0	0	0	0	0	0	0	0	0		>12	0	24	15	18	19	13	4	2
	386	288	264	430	67	14			streches	0	0	0	0	0	0	0		streches	0	0	0	0	0	0	0	0	0		streches	0	0	0	2	1	0	0	0
	346	434	107	61	81	369			total	25	33	26	31	39	29	30		total	32	22	26	26	26	31	43	34	36		total	31	35	33	27	37	24	20	30
	305	388	164	189	9	44
	385	301	197	984	199	202
	368	736	145	425	414	50
	356	508	154	277	276	255
	973	637	121	176	255	179
	729	480	432	511	549	536		C
	880	456	192	276	341	22
	252	862	118	108	39	357			RAD-51 foci					RAD-51 foci					RAD-51 foci					RAD-51 foci
	358	761	191	252	615	13			rec-8(ok987)					coh-3(gk112) coh-4(tm1857)					rec-8(ok987) syp-2(ok307)					syp-2(ok307) coh-3(gk112) coh-4(tm1857)
	320	395	197	42	216	44			Germline 1	MP	LP	Diplo/Diak		Germline 1	MP	LP	Diplo/Diak		Germline 1	MP	LP	Diplo/Diak		Germline 1	MP	LP	Diplo/Diak
	575	424	141	37	166	386			0	0	0	0		0	0	11	10		0	0	2	0		0	7	5	4
	917	1481	429	487	450	740			1	0	1	0		1	0	6	0		1	0	0	0		1	5	2	2
	321	298	181	119	144	150			2 3	0	0	1		2 3	0	6	1		2 3	3	0	0		2 3	6	4	0
	223	278	194	268	179	714			4 6	2	3	5		4 6	0	4	0		4 6	0	2	0		4 6	1	5	0
	272	264	264	16	247	463			7 12	5	1	2		7 12	0	4	0		7 12	1	1	0		7 12	0	0	0
	674	487	220	227	232	368			>12	9	11	0		>12	28	1	0		>12	0	1	2		>12	0	0	0
	361	657	286	345	262	169			streches	18	10	0		streches	7	1	0		streches	31	27	8		streches	0	0	0
	380	148	230	430	87	30			total	34	26	8		total	35	33	11		total	35	33	10		total	19	16	6
	939	483	248	211	269	62
	768	215	284	207	335	344			Germline 2	MP	LP	Diplo/Diak		Germline 2	MP	LP	Diplo/Diak		Germline 2	MP	LP	Diplo/Diak		Germline 2	MP	LP	Diplo/Diak
	375	335	477	108	328	155			0	0	0	0		0	0	11	14		0	0	2	0		0	10	22	6
	250	149	527	152	91	175			1	0	0	1		1	0	6	0		1	0	0	0		1	5	6	0
	383	361	171	194	219	24			2 3	0	0	0		2 3	0	5	1		2 3	0	1	0		2 3	12	2	1
	375	550	280	4	156	127			4 6	0	0	2		4 6	0	3	0		4 6	0	1	2		4 6	8	0	0
	234	577	176	218	141	92			7 12	9	5	3		7 12	0	0	0		7 12	0	0	1		7 12	1	0	0
	229	472	208	399	194	93			>12	6	3	0		>12	28	0	0		>12	0	2	2		>12	0	0	0
	455	672	259	185	208	1084			streches	15	11	2		streches	4	1	0		streches	34	27	4		streches	0	0	0
	374	507	200	218	297	40			total	30	19	8		total	32	26	15		total	34	33	9		total	36	30	7
	571	440	278	200	287	85
	650	495	417	238	343	132			Germline 3	MP	LP	Diplo/Diak		Germline 3	MP	LP	Diplo/Diak		Germline 3	MP	LP	Diplo/Diak		Germline 3	MP	LP	Diplo/Diak
	275	695	324	91	354	424			0	0	0	0		0	0	16	18		0	0	0	0		0	3	18	5
	202	689	193	513	318	342			1	0	0	0		1	0	10	1		1	0	0	0		1	5	6	0
	715	561	641	293	206	251			2 3	0	2	0		2 3	0	2	0		2 3	0	0	0		2 3	14	4	0
	301	85	268	243	353	36			4 6	0	0	3		4 6	0	3	0		4 6	0	1	0		4 6	12	5	0
	403	488	196	88	265	235			7 12	4	1	3		7 12	0	0	0		7 12	0	0	0		7 12	0	0	0
	487	554	250	5	256	223			>12	12	5	0		>12	26	2	0		>12	1	1	0		>12	0	0	0
	315	323	245	284	348	344			streches	19	14	0		streches	9	0	0		streches	30	27	9		streches	0	0	0
	392	603	328	245	229	350			total	35	22	6		total	35	33	19		total	31	29	9		total	34	33	5
	327	382	532	174	96	508
	354	1016	210	40	72	511
	326	324	191	181	71	24
	285	337	216	60	684	139
	298	341	299	350	220	65
	470	265	141	286	227	667
	403	249	220	328	486	430
	468	389	192	820	294	137
	458	300	133	162	327	260
	187	289	202	83	147	66
	647	487	278	28	39	53
	543	454	227	267	203	4
	488	262	318	205	299	390
	387	389	250	180	294	35
	369	410	228	137	4	44
	758	495	237	378	451	333
	245	397	176	104	189	440
	412	410	274	443	169	462
	526	368	201	203	459	296
	192	1054	180	263	329	433
	352	322	199	39	270	194
	780	190	296	329	207	649
	396	180	181	416	135	20
	344	350	207	314	126	143
	979	309	836	263	62	421
	296	345	186	5	253	53
	186	544	209	534	282	415
	455	551	247	180	82	38
	225	521		375	207	314
	821	303		208	78	212
	181	511		442	241	1199
	127	297		386	24	420
	335	426		171	273	349
	210	449		202	259	548
	234	583		327	195	9
	1272	368		190	87	103
	319	201		315	250	208
	798	293		75	439	24
	443	1055		219	297	2
	541	245		110	312	69
	378	350		6	375	30
	339	193		214	27	8
	278	356		222	305	104
	400	508		287	562	751
	346	1023		76	334	331
	307	396		312	293	16
	531	361		270	198	24
	414	399		169	150	296
	397	786		158	161	8
	4	532		205	160	34
	355	449		377	162	53
	515	409		309	250	355
	345	400		239	302	158
	380	415		446	669	850
	3	769		163	200	160
	482	433		269	472	361
	318	210		192	29	35
	430	340		700	56	496
	508	431		82	132	52
	445	673		109	291	323
	484	275		316	402	172
	4	563		229	391	3
	205	287		144	180	139
	139	536		299	157	6
	271	50		443	494	33
	261	20		144	329	3
	974			296	353	182
	811			109	239	345
	265			336	402	438
	370			90	287	36
	415			102	235	52
	534			68	63	7
	412			110	222	258
	981			66	355	393
	341			15	7	37
	342			537	60	180
	460			62	124	115
	282			477	64	53
	146			142	975	100
	989			166	1332	199
				727	23	100
				167	374	62
				148	57	19
				105	88	3
				251	83	14
				273	6	300
				45	129	537
				382	470	475
				50	138	149
				305	244	14
				220	153	45
				109	71	330
				219	58	88
				677	535	55
				267	350	2
				474	271	418
				413	243	59
				127	718	1343
				110	252	591
				236	724	96
				211	304	351
				82	233	125
				46	318	147
				221	238	16
				312	391	180
				197	116	236
				134	311	393
				239	240	108
				200	31	942
				234	36	557
				348	177	176
				334	33	433
				683	661	19
				35	86	97
				346	168	247
				197	268	161
				233	376	14
				151	100	7
				317	258	45
				128	234	11
				71	768	8
				187	328	40
				353	309	51
				607	434	3
				279	245	93
				187	224	50
				160	346	70
				94	304	23
				243	486	21
				374	75	129
				336	249	26
				225	54	157
				267	137	388
				193	31	266
				240	382	362
				209	259	560
				73	351	61
				317	761	519
				197	311	501
				649	247	261
				139	232	340
				241	312	137
				96	231	296
				134	232	315
				213	847	264
				123	91	132
				118	73	278
				1074	158	220
				133	278	330
				178	13	291
				169	331	393
				200	266	44
				181	368	255
				37	185	420
				114	215	105
				11	276	158
				168	1197	137
				39	585	357
				128	228	167
				135	206	106
				270	178	28
				426	113	12
				23	234	1084
				168	239	54
				229	653	25
				288	244	296
				298	560	487
				172	227	187
				54	224	79
				249	149	604
				157		699
				274		240
				305		58
				228		15
				408		294
				367		72
				188		155
				289		72
				98		825
				88		197
						5
						140
						546
						80
						64
						70
						14
						568
						22
						838
						235
						300
						81
						2
						97
						236
						42
						626
						69
						43
